## 12 **Abstract**

13 The current study investigates the seroprevalence of the Hepatitis C Virus (HCV) among sex workers in  
14 Pakistan, a challenging task due to social and cultural barriers. Our primary objectives were to gauge the  
15 extent of HCV exposure in this marginalized group, identify disparities in seroprevalence between sexes,  
16 and examine the association between seropositivity and various demographic and risk factors. A total of  
17 1,000 participants were enrolled, with male sex workers comprising the majority (87.7%) and female sex  
18 workers accounting for 12.3%. Notably, a significant portion fell within the 26-35 age category (39.9%).  
19 A significant proportion (47.1%) had not received formal education. Overall, HCV antibodies were found  
20 in 15% of the participants. Disparities were evident, with a seroprevalence of 13% in male sex workers  
21 and a significantly higher 31% in female sex workers. HCV seropositivity increased with age, with  
22 female sex workers showing a sharper rise. A link between levels of formal education and HCV  
23 seroprevalence was observed, with female sex workers consistently exhibiting higher seroprevalence  
24 across educational levels. Risk factors such as shaving practices, blade sharing, surgical history, and other  
25 medical exposures were assessed, revealing higher HCV seropositivity rates among those exposed,  
26 especially pronounced among female participants. This research study paves the way for future  
27 investigations and interventions tailored to this population's unique needs and vulnerabilities.

28

## 29 **Keywords**

30 HCV; Seroprevalence; HCV risk factors; Sex workers



55 education and healthcare. With a staggering approximation of 10 million individuals living with HCV in  
56 Pakistan, the dearth of intricate data on HCV seroprevalence within the sex worker community is palpable  
57 (18-20).

58 To bridge this informational gap, the presented work aimed to study the HCV seroprevalence among male  
59 and female sex workers and examine the associated risk factors. The undertaking of research within such  
60 marginalized communities as the sex workers in Pakistan mandated an approach imbued with  
61 collaboration and empathy. To this end, we established a partnership with *Dostana*, an organization  
62 steadfastly dedicated to the empowerment and health advocacy of vulnerable communities. This alliance  
63 enabled an effective and considerate engagement with the sex worker community in Pakistan, ensuring  
64 the study was conducted with due deference while addressing the distinctive needs and challenges faced  
65 by this community.

## 66 **Methodology**

### 67 **Research Design and Participant Selection**

68 This cross-sectional study determines the seroprevalence of the Hepatitis C Virus (HCV) among sex  
69 workers in Pakistan. A total of 1000 participants, male and female, were included in this study. The  
70 inclusion criteria stipulated that participants must be sex workers aged 15 years or older and possess  
71 proficiency in Punjabi or Urdu. Participants were recruited through the *Dostana Male Health Society*, a  
72 recognized society that addresses key populations' healthcare concerns. Due to Pakistan's societal and  
73 cultural barriers, engaging with individuals in these marginalized communities is challenging. As a  
74 solution, community members were educated and guided to gather data from the sex workers population  
75 enlisted through *Dostana*.

76 The data collection process involved structured interviews. After the necessary training, data enumerators  
77 administered the structured questionnaires through one-on-one interviews. This process of data collection  
78 and participants recruitment took place between 13-06-2022 and 30-03-2023. This method ensured that  
79 the process was consistent, comprehensive, and aimed at minimizing potential bias or misinterpretation of  
80 the questions. The data were collected on demographic characteristics, common risk factors, and history  
81 of HIV.

### 82 **Ethical Considerations**

83 The study protocol is reviewed and approved by the Bioethics Committee of the Cancer Research Centre,  
84 University of the Punjab. All participants provided informed written consent before participating in the  
85 study. The study is conducted following the Declaration of Helsinki.

## 86 **Serological Testing**

87 Blood samples are collected from participants for serological testing. The presence of HCV antibodies is  
88 determined using the SD BIOLINE HCV Hepatitis C Virus Antibody Test. All tests are conducted in a  
89 certified laboratory following standard procedures.

## 90 **Statistical Analysis**

91 Descriptive statistics are used to summarize the demographic characteristics of the participants and the  
92 Prevalence of HCV. All analyses are performed using MS Excel.







## 154 **Identified Risk Factors and Their Relationship to HCV**

### 155 **Seroprevalence**

156 Next, we analyzed the impact of Identified risk factors on HCV seroprevalence in male and female sex  
157 workers (**Table 3**). In the context of shaving practices, individuals shaving at home had a higher overall  
158 HCV seropositivity of 18.97% compared to those using salon services (12.62%) or both (13.27%). This  
159 trend was consistent among men, with 10.81% positivity in those who shaved at home versus 12.58% and  
160 13.54% for those who used salon services and both, respectively. However, for women, the pattern  
161 diverged. Women who shaved at home had a significantly high HCV seropositivity of 33.33%, while  
162 women who used salon services showed seropositivity of 14.29%.











251 affect the robustness of the associations and patterns observed, particularly in relation to gender-specific  
252 findings. This smaller female cohort size limits the generalizability of our findings to the broader  
253 population of female sex workers in Pakistan and beyond. The gender-specific disparities and trends  
254 observed in our study warrant further exploration through more extensive, more representative studies  
255 focusing on female sex workers. Another potential limitation of our study is the self-reported data, which  
256 may be subject to recall bias. Despite these limitations, our study contributes valuable insights into the  
257 HCV seroprevalence among sex workers in Pakistan, laying the groundwork for future research and  
258 interventions tailored to address the unique needs and vulnerabilities of this population. The insights  
259 garnered from this research underscore the pressing need for concerted action and commitment to address  
260 the health disparities faced by sex workers and to foster an environment conducive to their well-being and  
261 access to healthcare.

## 262 **Acknowledgments**

263 We would like to offer our gratitude to all the community members who helped us in sampling and  
264 collecting data from this marginalized community.

## 265 **Declarations**

### 266 **Generative AI**

267 *During the preparation of this work the author(s) used ChatGPT for editing the manuscript. After using this tool, the*  
268 *author(s) reviewed and edited the content as needed and take(s) full responsibility for the content of the publication.*







341 28. Rashti R, Alavian SM, Moradi Y, Sharafi H, Mohamadi Bolbanabad A, Roshani D, et al. Global  
342 prevalence of HCV and/or HBV coinfections among people who inject drugs and female sex workers who  
343 live with HIV/AIDS: a systematic review and meta-analysis. Arch Virol. 2020;165(9):1947-58.

344
